# Supplementary material for: The Hsp70 co-chaperone Ydj1/HDJ2 regulates ribonucleotide reductase activity
Source: PubMed Central journal article supplement (PMC6277125; doi:10.1371/journal.pgen.1007462), 2018-11-19
Supplement: pgen.1007462.s001.pdf [file pgen.1007462.s001.pdf]

Yeast strains used in this study

| Strain | Genotype                                                                                                                 | Source     |
|--------|--------------------------------------------------------------------------------------------------------------------------|------------|
| ATY8   | MATa S288c (BY4742) <i>his3Δ1 leu2Δ0 lys2Δ0 ura3Δ0</i>                                                                   | Euroscarf  |
| ATY9   | MATa S288c (BY4742) <i>mr4Δ::KanMX4</i>                                                                                  | Euroscarf  |
| ATY10  | MATa S288c (BY4742) <i>erj5Δ::KanMX4</i>                                                                                 | Euroscarf  |
| ATY11  | MATa S288c (BY4742) <i>aha1Δ::KanMX4</i>                                                                                 | Euroscarf  |
| ATY12  | MATa S288c (BY4742) <i>swa2Δ::KanMX4</i>                                                                                 | Euroscarf  |
| ATY13  | MATa S288c (BY4742) <i>ppt1Δ::KanMX4</i>                                                                                 | Euroscarf  |
| ATY14  | MATa S288c (BY4742) <i>opr6Δ::KanMX4</i>                                                                                 | Euroscarf  |
| ATY15  | MATa S288c (BY4742) <i>jjj2Δ::KanMX4</i>                                                                                 | Euroscarf  |
| ATY16  | MATa S288c (BY4742) <i>lhs1Δ::KanMX4</i>                                                                                 | Euroscarf  |
| ATY17  | MATa S288c (BY4742) <i>eba1Δ::KanMX4</i>                                                                                 | Euroscarf  |
| ATY18  | MATa S288c (BY4742) <i>sse1Δ::KanMX4</i>                                                                                 | Euroscarf  |
| ATY19  | MATa S288c (BY4742) <i>sil1Δ::KanMX4</i>                                                                                 | Euroscarf  |
| ATY20  | MATa S288c (BY4742) <i>stt1Δ::KanMX4</i>                                                                                 | Euroscarf  |
| ATY21  | MATa S288c (BY4742) <i>mdj2Δ::KanMX4</i>                                                                                 | Euroscarf  |
| ATY22  | MATa S288c (BY4742) <i>xdj1Δ::KanMX4</i>                                                                                 | Euroscarf  |
| ATY23  | MATa S288c (BY4742) <i>caj1Δ::KanMX4</i>                                                                                 | Euroscarf  |
| ATY24  | MATa S288c (BY4742) <i>hij1Δ::KanMX4</i>                                                                                 | Euroscarf  |
| ATY25  | MATa S288c (BY4742) <i>scj1Δ::KanMX4</i>                                                                                 | Euroscarf  |
| ATY26  | MATa S288c (BY4742) <i>snl1Δ::KanMX4</i>                                                                                 | Euroscarf  |
| ATY27  | MATa S288c (BY4742) <i>apj1Δ::KanMX4</i>                                                                                 | Euroscarf  |
| ATY28  | MATa S288c (BY4742) <i>ydj1Δ::KanMX4</i>                                                                                 | Euroscarf  |
| ATY29  | MATa S288c (BY4742) <i>cpr7Δ::KanMX4</i>                                                                                 | Euroscarf  |
| ATY30  | MATa S288c (BY4742) <i>jj3Δ::KanMX4</i>                                                                                  | Euroscarf  |
| ATY31  | MATa S288c (BY4742) <i>jem1Δ::KanMX4</i>                                                                                 | Euroscarf  |
| ATY32  | MATa S288c (BY4742) <i>sec63Δ::KanMX4</i>                                                                                | Euroscarf  |
| ATY33  | MATa S288c (BY4742) <i>zuo1Δ::KanMX4</i>                                                                                 | Euroscarf  |
| ATY34  | MATa S288c (BY4742) <i>tah1Δ::KanMX4</i>                                                                                 | Euroscarf  |
| ATY35  | MATa S288c (BY4742) <i>sse2Δ::KanMX4</i>                                                                                 | Euroscarf  |
| ATY36  | MATa S288c (BY4742) <i>jj1Δ::KanMX4</i>                                                                                  | Euroscarf  |
| ATY37  | MATa S288c (BY4742) <i>fes1Δ::KanMX4</i>                                                                                 | Euroscarf  |
| ATY222 | MATa S288c (BY4742):: <i>RNR1-GFP-HIS3MX6</i>                                                                            | This study |
| ATY227 | MATa S288c (BY4742):: <i>ydj1Δ::kanMX4 RNR1-GFP-HIS3MX6</i>                                                              | This study |
| ATY229 | MATa S288c (BY4742):: <i>RNR2-GFP-HIS3MX6</i>                                                                            | This study |
| ATY233 | MATa S288c (BY4742) <i>ydj1Δ::KanMX4::RNR2-GFP-His3MX6</i>                                                               | This study |
| ATY236 | MATa S288c (BY4742):: <i>RNR4-GFP-HIS3MX6</i>                                                                            | This study |
| ATY240 | MATa S288c (BY4742) <i>ydj1Δ::KanMX4::RNR4-GFP-HIS3MX6</i>                                                               | This study |
| ATY264 | JJ160 (a <i>trp-1 ura3-1 leu2-3,112 his3-11,15 ade2-1 can1-100 GAL2Δ met2-Δ1 lys2-Δ2 ydj1::HIS3</i> ) <i>pRS316-YDJ1</i> | EA Craig   |
| ATY265 | JJ160 <i>pRS315-YDJ1</i>                                                                                                 | EA Craig   |
| ATY267 | JJ160 <i>pRS315-YDJ1(1-134)</i>                                                                                          | EA Craig   |
| ATY269 | JJ160 <i>pRS315-YDJ1(1-206)</i>                                                                                          | EA Craig   |
| ATY270 | JJ160 <i>pRS315-YDJ1(1-363)</i>                                                                                          | EA Craig   |
| ATY272 | JJ160 <i>pRS315-YDJ1(G153R)</i>                                                                                          | EA Craig   |
| ATY273 | JJ160 <i>pRS315-YDJ1(G315D)</i>                                                                                          | EA Craig   |
| ATY274 | JJ160 <i>pRS315-YDJ1(C406S)</i>                                                                                          | EA Craig   |
| ATY275 | JJ160 <i>pRS315</i>                                                                                                      | This study |
| ATY280 | JJ160 <i>pMR267 (Ydj1-cMyc)</i>                                                                                          | This study |
| ATY281 | JJ160 <i>pMR267 (Ydj1-D36N-cMyc)</i>                                                                                     | This study |
| ATY282 | JJ160 <i>pMR275 (SYY c-Myc)</i>                                                                                          | This study |
| ATY283 | JJ160 <i>pMR277 (YSY c-Myc)</i>                                                                                          | This study |
| ATY284 | JJ160 <i>pMR278 (SSY c-Myc)</i>                                                                                          | This study |
| ATY285 | JJ160 <i>pRS314</i>                                                                                                      | This study |
| ATY362 | JJ160 :: <i>RNR2-GFP-KANMX4 pMR267 Ydj1-cMyc</i>                                                                         | This study |
| ATY363 | JJ160 :: <i>RNR2-GFP-KANMX4 pMR267 Ydj1(D36N)-cMyc</i>                                                                   | This study |

Plasmids used in this study

| Plasmid | Description                             | Reference/Source |
|---------|-----------------------------------------|------------------|
| ATP79   | <i>pCMV3.1 HIS-FLAG HSC70</i>           | This study       |
| ATP399  | <i>pCMV3.1 HIS-R2B</i>                  | This study       |
| ATP400  | <i>pUG36-RNR2-GFP</i>                   | This study       |
| ATP433  | <i>pUG36</i>                            | J. H. Hegemann   |
| ATP573  | <i>pMR278 (SSY c-Myc)</i>               | D. Masison       |
| ATP574  | <i>pMR277 (YSY c-Myc)</i>               | D. Masison       |
| ATP575  | <i>pMR275 (SSY c-Myc)</i>               | D. Masison       |
| ATP576  | <i>pMR267 (Ydj1-D36N-cMyc)</i>          | D. Masison       |
| ATP578  | <i>pMR267 (Ydj1-cMyc)</i>               | E A Craig        |
| ATP580  | <i>pRS315-YDJ1(1-134)</i>               | E A Craig        |
| ATP582  | <i>pRS315-YDJ1(1-206)</i>               | E A Craig        |
| ATP584  | <i>pRS315-YDJ1(1-363)</i>               | E A Craig        |
| ATP586  | <i>pRS315-YDJ1(G153R)</i>               | E A Craig        |
| ATP587  | <i>pRS315-YDJ1(G315D)</i>               | E A Craig        |
| ATP588  | <i>pRS315-YDJ1(C406S)</i>               | E A Craig        |
| ATP-590 | <i>pRS413-RNR2 promoter-FLAG-RNR2</i>   | M Huang          |
| ATP592  | <i>RNR3 promoter-lacZ</i>               | W. Xiao          |
| ATP716  | <i>pBG1085-GAL1 promoter-ZZ-HA-RNR1</i> | Dharmacon        |
| ATP717  | <i>pBG1085-GAL1 promoter-ZZ-HA-RNR2</i> | Dharmacon        |
| ATP718  | <i>pBG1085-GAL1 promoter-ZZ-HA-RNR4</i> | Dharmacon        |
| ATP-723 | <i>pFA6a-GFP(S65T)-KANMX6</i>           | J. Pringle       |
| ATP-724 | <i>pFA6a-GFP(S65T)-HIS3MX6</i>          | J. Pringle       |

Table of primers used for RT-qPCR

| Name          | Sequence                    |
|---------------|-----------------------------|
| <i>RNR1</i> F | 5'-GTGTTCAAGGTCTCCTGAC-3'   |
| <i>RNR1</i> R | 5'-CGTATGGACCGTCCTTCTGA-3'  |
| <i>RNR2</i> F | 5'-CCTAAAGAGACCCCTCCAAAG-3' |
| <i>RNR2</i> R | 5'-GCCTTGATTTTCAGCGTC-3'    |
| <i>RNR3</i> F | 5'-GCCTCCGCTGCTATTCAA-3'    |
| <i>RNR3</i> R | 5'-CAGATGCCCGCTTTTGT-3'     |
| <i>RNR4</i> F | 5'-CATAAGGCTGCTTTCATCGAG-3' |
| <i>RNR4</i> R | 5'-CTGTTGGCCATTGCTAAACC-3'  |
| <i>ACT1</i> F | 5'-GTATGTGTAAGCCGGTTTG-3'   |
| <i>ACT1</i> R | 5'-CATGATACCTGGTGTCTGG-3'   |
